*Title*

**Localisation and hypersecretion of Nerve Growth Factor in breast Phyllodes tumours: evidence from a preliminary study**

*Authors*

**Ashutosh Kumar<sup>1,2</sup>, Khursheed Raza<sup>1,4</sup>, Tapas C. Nag<sup>1</sup>, Anurag Srivastava<sup>3</sup>, Ritu Sehgal<sup>1\*</sup>**

*Affiliations*

<sup>1</sup> Department of Anatomy, All India Institute of Medical Sciences (AIIMS), New Delhi, India.

<sup>2</sup> Department of Anatomy, AIIMS, Patna, India.

<sup>3</sup> Department of Surgery, AIIMS, New Delhi, India.

<sup>4</sup> Department of Anatomy, Sridev Suman Subharti Medical College (SSSMC), Dehradun, Uttarakhand, India.

*\* Corresponding author*

Dr. Ritu Sehgal, Professor, Department of Anatomy, AIIMS, Ansari Nagar, New Delhi - 110029, India.  
Tel. (O): +91-11-26546624; email: sehgalritu@hotmail.com

# **Localisation and hypersecretion of Nerve Growth Factor in breast Phyllodes tumours: evidence from a preliminary study**

## **Abstract**

### **Background**

The pathophysiology of the breast phyllodes tumours is uncertain. Currently, wide surgical removal is the only available treatment option. The histopathological diagnosis of phyllodes tumours is often confused with that of fibroadenomas due to a striking histological resemblance; hence a distinctive biomarker for this tumour type is warranted.

### **Material & Methods**

Fresh human breast tissue was obtained from surgically excised breast phyllodes and fibroadenoma tumours (test, 2 cases each), breast cancer (positive control, 2 cases) and normal breast tissue (negative control, 1 case). Immunohistochemistry was performed for the detection of nerve growth factor (NGF) on frozen sections of the test and control tissues fixed in 4% paraformaldehyde, using the indirect streptavidin-biotin-peroxidase complex method. Sandwich ELISA on tissue homogenates of the same test and control cases was also performed to validate the immunohistochemical findings.

### **Results**

A marked difference in NGF expression was detected in phyllodes tumours compared to fibroadenomas. The maximum NGF expression was observed in phyllodes tissue followed by cancer tissue, and the least expression in fibroadenomas (3-5 times less than in phyllodes; comparable with normal breast tissue).

### **Conclusion**

NGF is known for its growth inducing potential in breast cancer, but its secretion by a benign breast tumour is not known in literature. This study reports abundant NGF secretion by breast phyllodes, raising the possibility of its potential role in tumour pathogenesis and progression that can be exploited therapeutically in future. We also propose that NGF may be used as a distinct biomarker of phyllodes tumours, for differentiating them from fibroadenomas during histopathology.

**Key words:** nerve growth factor; phyllodes tumours; fibroadenoma; breast cancer; histopathology

## 54 **Introduction**

55 Phyllodes are rare fibro-epithelial tumours of the breast with an incidence of less than 1% of which  
 56 malignant phyllodes account for 10-20% of the tumours [1]. The phyllodes tumours show high potential  
 57 for growth, recurrence and malignant transformation, being sub-classified into three categories: benign,  
 58 borderline and malignant [2]. Lymph node involvement and distant metastasis are rare but known in  
 59 malignant cases.

60 Knowledge about phyllodes tumorigenesis is quite patchy and scarce in available literature. No  
 61 biomarker or drug target has yet been identified for these tumours. This article reports for the first time,  
 62 new evidence of hypersecretion of nerve growth factor (NGF) by phyllodes tumours. NGF is known to  
 63 be secreted exclusively by cancer cells (including breast cancer), and suspected to be involved in their  
 64 etiology and tumour progression [3, 4]. Excessive secretion by benign breast phyllodes as observed in  
 65 our study implies NGF involvement in the genesis and progression of these tumours. We also propose a  
 66 potential diagnostic value for NGF as a biomarker to differentiate phyllodes tumours from  
 67 fibroadenomas. These two benign growths share a very close histological resemblance that leads to  
 68 frequent errors in histopathological diagnosis [5, 6].

## 69 **Material and methods**

### 70 **Material**

71 The test samples of benign phyllodes and fibroadenoma (2 cases each) were obtained from fresh surgical  
 72 specimens of breast tumours removed from clinically and histopathologically diagnosed cases in  
 73 women. The positive controls (2 cases) and the single negative control were taken from established  
 74 cases of malignant (intra-ductal carcinoma) and normal breast tissue, respectively. The controls were  
 75 chosen based on their known NGF secretory status, as reported in the literature [3, 4]. All these samples

were provided by the Departments of Surgery and Pathology, All India Institute of Medical Sciences (AIIMS), New Delhi after ethical clearance from the institutional human ethics committee (IEC No: NP-325/2013RP03/2013).

## Methods

### *Immunohistochemistry (IHC)*

IHC was performed on cryosections (thickness: 12-14µm) of tissue samples fixed in 4% paraformaldehyde in 0.1 M phosphate buffer for 6-8 hours at 4°C, using the standard indirect streptavidin-biotin-peroxidase complex method. The sections were incubated with primary antibodies against NGF (dilution: 1 µg/ml, Abcam Plc., UK, rabbit polyclonal) for 48 h, followed by incubation in anti-rabbit secondary antibody (dilution: 1 µg/ml) and avidin-biotin peroxidase (Vectastain Elite ABC kit, Vector Laboratories, Burlingame, CA, USA). The reactions were developed by treating sections with 3, 3 diaminobenzidine tetrahydrochloride (DAB, Sigma-Aldrich Corporation, MO, USA). The core biopsy tissue of the breast cancer and normal breast tissue were used as external positive and negative controls, respectively. The internal negative control was the tumour tissue without applying primary antibody. Haematoxylin was used as a counter-stain in fibroadenoma cases to see histological details. The images were captured with a digital camera under an optical microscope (Leica DM6000B bright-field microscope) using software (Leica Application Suites, Version 3.4.1; Leica Microsystems, Switzerland). The images were analysed using ImageJ software (NIH, USA) for assessment of staining intensity in specific tissue components and overall scoring.

### *Enzyme-linked immunosorbent assay (ELISA)*

ELISA (human beta NGF, sensitivity <14 pg/ml, range 6.86 pg/ml to 5000 pg/ml; catalog number: ab99986, Abcam Plc., UK) was applied on test and control samples for quantification of NGF. Fresh surgically removed tissue samples were preserved with isopentane at – 80 °C. The tissues were thawed,

weighed and homogenised in homogenization buffer (10 mM Tris, 150 mM NaCl, 0.25% sodium deoxycholate and protease inhibitors). Homogenates were centrifuged at 10,000 rpm at 4°C, following which the supernatant was collected for total protein estimation by Bradford method and equilibration using assay buffer. NGF competitive inhibition ELISA was performed in duplicates using the antibody pre-coated plate, by following the protocol provided with the kit. The readings of the test were taken at 450 nm in an ELISA plate reader and the data analysed for final NGF concentration in the samples, using the standard curve values derived from the recombinant NGF provided with the kit (concentration was expressed in ng/50µl).

## Results

### *Immunohistochemistry (IHC)*

Intense NGF expression was observed in test samples obtained from cases of benign phyllodes, comparable with that seen in breast tissue collected from cases of intra-ductal carcinoma (IDC, positive control). However, NGF expression was almost absent in test samples obtained from cases of fibroadenoma (Fig. 1, Table 1).

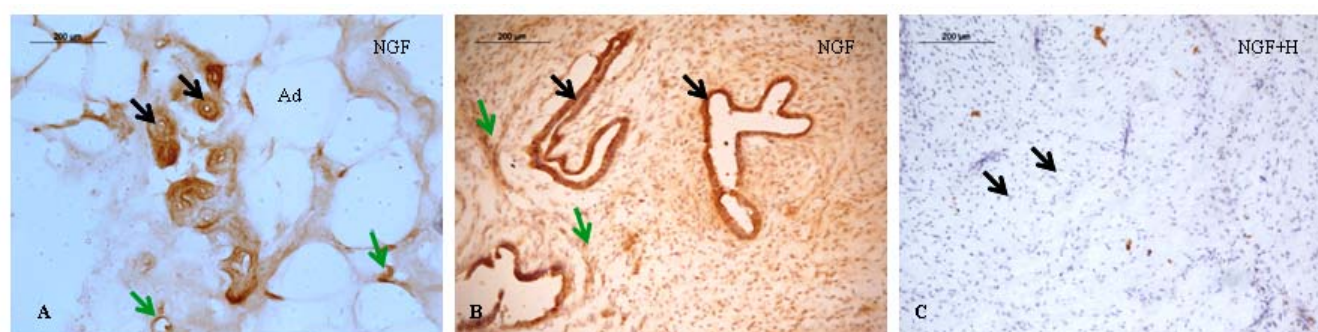

**Fig. 1 Immunohistochemical localisation of NGF in breast tumours. A.** CA breast (IDC), intense NGF expression in ductal epithelium (black arrows) and small vessels (green arrows), Ad – adipocyte.

117 **B.** Phyllodes tumour, intense expression in ductal epithelium (black arrows) and stroma (green arrows).  
 118 **C.** Fibroadenoma, negligible expression, tissue counterstained with hematoxylin (H) to show nuclei of  
 119 fibrocytes, characteristic of fibroadenoma (black arrows).

120  
 121 **Table 1 NGF expression in breast tumours (as detected by IHC)**

| Tissue components  | CA Breast | Phyllodes | Fibroadenoma | Normal breast tissue |
|--------------------|-----------|-----------|--------------|----------------------|
| Duct               | +++       | +++       | —            | —                    |
| Stroma             | ++        | +++       | —            | —                    |
| Adipocytes         | ++        | +++       | —            | —                    |
| Small vessels      | +++       | +++       | —            | —                    |
| <b>Total score</b> | 10        | 12        | 0            | 0                    |

122 — (No expression detected, score = 0), + (weak expression, score = 1), ++ (moderate expression, score = 2),  
 123 +++ (intense expression, score = 3), CA (carcinoma), IHC (Immunohistochemistry)

124  
 125 ***Enzyme-linked immunosorbent assay (ELISA)***

126 Quantification of NGF secretion gave readings that matched with IHC scores for all the test and control  
 127 samples. The highest NGF levels were observed in phyllodes tumours, followed by breast carcinoma  
 128 (CA). The levels were low and quite comparable in tissue specimens obtained from fibroadenomas and  
 129 normal breast (Fig. 2).

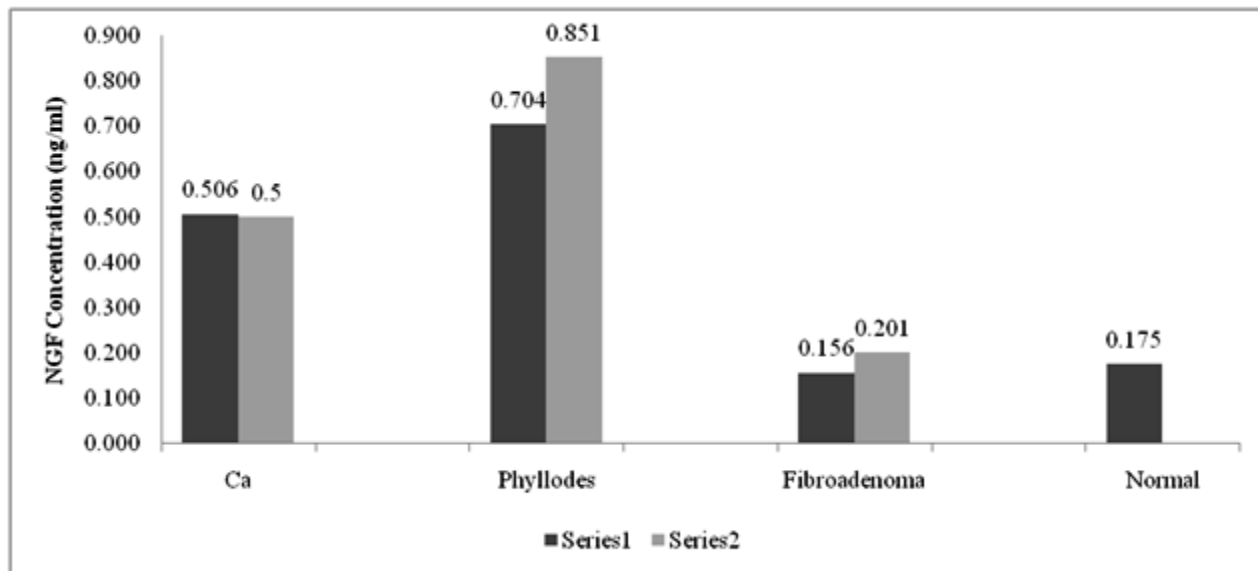

**Fig. 2 NGF expression in breast tumours (as detected by ELISA).**

Ca – breast cancer, Series 1 & 2 refers to the tissue samples collected from separate cases.

## Discussion

NGF is known for its growth-inducing potential and has been implicated for tumour progression in CA breast [4]. Although NGF has not been directly implicated in the pathogenesis of phyllodes tumours of the breast so far, a thorough literature survey revealed that certain molecules and pathways reported for these tumours can be structurally or functionally linked with NGF signalling. We observed a generalised over-expression on IHC in all tissue components of phyllodes tumours (ductal layers, stromal components, vessels) and negligible expression in those of fibroadenoma (Fig. 1, Table 1). Quantitative estimation by ELISA revealed NGF levels in phyllodes tumours to be approximately 1.5 times those observed in CA breast and 3-5 times those seen in fibroadenoma. This singular NGF over-expression by phyllodes tumours of the breast that has been noted in this study, points towards its possible role in tumourigenesis and tumour progression, and suggests the use of this molecule as a potential drug target.

Jardim *et al.* reported activating mutations for N-RAS oncogene and intense expression of Protein Kinase B (Akt) and mammalian target of rapamycin (mTOR) in malignant phyllodes with a concomitant over-expression of phosphoinositide 3-kinase (PI3K) [7]. Tyrosine kinase A (TrkA) is a high affinity receptor for NGF that mediates growth and proliferation. N-RAS is an oncogene which is thought to be an essential molecule for executing NGF-TrkA mediated PI3K/Akt/m-TOR activation and NGF mediated differentiation of PC12 cells (from a neuron-like cell line derived from pheochromocytoma of the rat adrenal medulla) [8]. Coincidentally, PI3K/Akt/m-TOR is the chief pathway mediating NGF signalling involved in growth and proliferation [9]. Furthermore, N-RAS has the chromosomal location 1p13.2 (Gene ID: 4893, NCBI, 2016) very close to that of NGF which is 1p13.1 (Gene ID: 4803, NCBI, 2016), suggesting the possibility of a functional linkage between the two genes [10]. N-RAS mutations are common in various tumours and a point mutation of the N-RAS gene may cause constitutive activation of the N-RAS dependent signalling pathways [11].

Several researchers have also found a huge genomic instability in phyllodes tumours which includes loci of 1p and 1q among other chromosomes [7, 12]. TrkA, the high affinity NGF receptor that mediates growth and proliferation is located on chromosome 1q 21-22. Moreover, keeping in mind the above-mentioned proximity of gene loci for NGF (1p13.1) and N-RAS (1p13.2), the instability of either of these loci may influence NGF expression and signalling in phyllodes tumours. Hence the role of this proximity of loci and concomitant genomic instability in the pathogenesis of phyllodes tumours needs to be examined.

#### ***Differentiation of phyllodes from fibroadenomas***

Phyllodes tumours are difficult to differentiate histologically from fibroadenomas [2, 6]. Although pronounced stromal cell activation is characteristic of phyllodes, sometimes it becomes truly puzzling for the pathologist to make an accurate diagnosis in cases where the tumours have intermediate features



[5, 6]. The unambiguous NGF over-expression by phyllodes (3-5 times more than that by fibroadenoma) that was observed in the present study, makes NGF a highly likely candidate for a suitable biomarker of breast phyllodes.

### ***Limitations and further considerations***

The sample size of this study being small, further studies with adequate sample size are necessary to validate the results. Future research may elucidate the dynamic interaction of NGF signalling pathway molecules in breast phyllodes. It would be particularly relevant and rewarding to establish beyond doubt, the diagnostic efficacy and specificity of NGF as a potential biomarker for phyllodes tumours of the breast.

### **Abbreviations**

NGF: nerve growth factor; TrkA: tyrosine kinase A receptor; IHC: immunohistochemistry; ELISA: enzyme-linked immunosorbent assay; IDC: intra-ductal carcinoma; CA: carcinoma; N-RAS: oncogene for N-ras protein that regulates cell division; Akt: Ak (mouse strain) transforming (retrovirus)/Protein Kinase B; m-TOR: mammalian target of rapamycin; PI3K: phosphoinositide 3-kinase; p: short arm of chromosome; q: long arm of chromosome; PC12: neuron-like cell line derived from pheochromocytoma of the rat adrenal medulla; NCBI: National Center for Biotechnology Information

### **Declarations**

#### ***Ethics approval and consent to participate***

Ethics approval from the Institute Ethics Committee (IEC) of the All India Institute of Medical Sciences (AIIMS) and informed consent from the participants was duly acquired prior to the commencement of the study (IEC No: NP-325/2013RP03/2013, AIIMS, New Delhi, India).

#### ***Consent for publication***

190 Not applicable.

### 191 *Availability of data and material*

192 The datasets used and analyzed during the current study may be acquired from the corresponding author  
193 on reasonable request.

### 194 *Competing interests*

195 The authors declare that they have no competing interests.

### 196 *Funding*

197 This work was supported by an intramural research grant from AIIMS, New Delhi, India. The authors  
198 contributing in the study design, data collection, analysis and interpretation, as well as manuscript  
199 writing were/are employed at AIIMS, New Delhi and were co-investigators for the research project at  
200 the time this study was conducted.

### 201 *Authors' contributions*

202 AK designed the study, performed the experiments, analyzed the data and wrote the manuscript. KR  
203 assisted in the experiments, data analysis and manuscript preparation. TCN provided the benefit of  
204 expertise and practical assistance in setting up the experiments and acquiring images. TCN, AS and RS  
205 edited the manuscript and provided logistic support and requisite guidance for designing and conducting  
206 the study. All authors read and approved the final manuscript.

### 207 *Acknowledgements*

208 We sincerely thank Professor T. S. Roy and Dr. T. G. Jacob from the Department of Anatomy, AIIMS,  
209 New Delhi. Dr. Roy gave unstinted support and practical assistance in helping us access the resources  
210 necessary for conducting this study. Dr. Jacob provided valuable inputs for data analysis and manuscript  
211 writing.

# References

1. Lakhani SR, Ellis IO, Schnitt SJ, Tan PH, van de Vijver MJ. Fibroepithelial Tumours. In: Lakhani SR, Ellis IO, Schnitt SJ, Tan PH, van de Vijver MJ, editors. World Health Organization Classification of Tumours of the Breast. 4th ed. Lyon: International Agency for Research on Cancer Press; 2012. p. 143-147.
2. Tan PH, Jayabaskar T, Chuah KL, Lee HY, Tan Y, Hilmy M, et al. Phyllodes tumours of the breast: the role of pathologic parameters. *Am J Clin Pathol*. 2005; 123(4): 529-540.
3. Molloy NH, Read DE, Gorman AM. Nerve growth factor in cancer cell death and survival. *Cancers (Basel)*. 2011; 3(1): 510-530. doi: 10.3390/cancers3010510.
4. Dollé L, El Yazidi-Belkoura I, Adriaenssens E, Nurcombe V, Hondermarck H. Nerve growth factor overexpression and autocrine loop in breast cancer cells. *Oncogene*. 2003; 22(36): 5592-5601.
5. Oprić S, Oprić D, Gugić D, Granić M. Phyllodes tumours and fibroadenoma – common beginning and different ending. *Coll Antropol*. 2012; 36(1): 235-241.
6. Yasir S, Gamez R, Jenkins S, Visscher DW, Nassar A. Significant histologic features differentiating cellular fibroadenoma from phyllodes tumor on core needle biopsy specimens. *Am J Clin Pathol*. 2014; 142(3): 362-369. doi: 10.1309/AJCPZUZ96RESGPUP.
7. Jardim DL, Conley A, Subbiah V. Comprehensive characterization of malignant phyllodes tumor by whole genomic and proteomic analysis: biological implications for targeted therapy opportunities. *Orphanet J Rare Dis*. 2013; 8: 112. doi: 10.1186/1750-1172-8-112.

8. Hallberg B, Ashcroft M, Loeb DM, Kaplan DR, Downward J. Nerve growth factor induced stimulation of Ras requires Trk interaction with Shc but does not involve phosphoinositide 3-OH kinase. *Oncogene*. 1998; 17(6): 691-697.
9. Chen JY, Lin JR, Cimprich KA, Meyer T. A two-dimensional ERK-AKT signaling code for an NGF-triggered cell-fate decision. *Mol cell*. 2012; 45(2): 196-209.
10. Mitchell EL, Jones D, White GR, Varley JM, Koref MS. Determination of the gene order of the three loci CD2, NGFB, and NRAS at human chromosome band 1p13 and refinement of their localisation at the sub-band level by fluorescence in situ hybridisation. *Cytogenet Cell Genet*. 1995; 70(3-4):183-185.
11. Nikiforov YE. Molecular analysis of thyroid tumours. *Mod Pathol*. 2011; 24 Suppl 2: S34-43. doi: 10.1038/modpathol.2010.167.
12. Jee KJ, Gong G, Ahn SH, Park JM, Knuutila S. Gain in 1q is a common abnormality in phyllodes tumours of the breast. *Anal Cell Pathol*. 2003; 25(2): 89-93.
